# Supplementary material
Source: publisher figshare collection journal article supplement (https://acs.figshare.com/ndownloader/files/4638109)
Supplement: Supplementary file 1 [file 4638109]

## **Supporting Information: Hydrogen Bonding Contributes to the Selectivity of Nucleotide Incorporation Opposite an Oxidized Abasic Lesion**

Haidong Huang and Marc M. Greenberg\*

Department of Chemistry  
Johns Hopkins University  
3400 N. Charles St.  
Baltimore, MD 21218

Phone: 410-516-8095

Fax: 410-516-7044

E-mail: mgreenberg@jhu.edu

### **Contents:**

1. General Methods. (S2-S3)
2. **Supporting Information Figure 1.** ESI-MS of **CPE** (3' to T). (S4)
3. **Supporting Information Figure 2.** ESI-MS of **CPE** (3' to C). (S5)
4. **Supporting Information Figure 3.** ESI-MS of **CPA** (3' to T). (S6)
5. **Supporting Information Figure 4.** ESI-MS of **CPA** (3' to C). (S7)
6. **Supporting Information Figure 5.** MALDI-TOF-MS of **Lm** (3' to T). (S8)
7. **Supporting Information Figure 6.** MALDI-TOF-MS of **Lm** (3' to C). (S9)
8. **Supporting Information Figure 7.** ESI-MS of **COH** (3' to T). (S10)
9. **Supporting Information Figure 8.** ESI-MS of **COH** (3' to C). (S11)
10. **Supporting Information Figure 9.** ESI-MS of **K** (3' to T). (S12)
11. **Supporting Information Figure 10.** ESI-MS of **K** (3' to C). (S13)
12. **Supporting Information Figure 11.** ESI-MS of **MCP** (3' to T). (S14)
13. **Supporting Information Figure 12.** ESI-MS of **MCP** (3' to C). (S15)
14. **Supporting Information Figure 13.** Bypass efficiency in wild type *E. coli*. local sequence: 5'-TXG-3'. (S16)
15. **Supporting Information Figure 14.** Bypass efficiency in wild type *E. coli*. local sequence: 5'-CXG-3'. (S16)
16. **Supporting Information Table 1.** Bypass efficiency in various polymerase-deficient *E. coli*. (S17)
17. **Supporting Information Table 2.** Percent single-nucleotide-deletion product in wild type *E. coli*. (S18)
18. **Supporting Information Table 3.** Percent single-nucleotide-deletion product in various polymerase-deficient *E. coli*. (S19)
19. **Supporting Information Figure 15.** Percent nucleotide incorporation opposite the lesions in Pol II and Pol IV deficient *E. coli*. local sequence: 5'-TXG-3'. (S20)
20. **Supporting Information Figure 16.** Percent nucleotide incorporation opposite the lesions in Pol II and Pol IV deficient *E. coli*. local sequence: 5'-CXG-3'. (S20)

**M13 Genome Construction and Replication in *E. coli*.** The synthetic DNA insert was cloned into the M13mp7L2 vector in triplicate as previously described.<sup>1,2</sup> Briefly, the insert (15 pmol) was phosphorylated (12 U PNK, 37 °C, 1 h) and ligated (1200 U, 16 °C, 2 h) into 10 pmol of EcoRI-digested plasmid using complementary scaffold (15 pmol). After digestion of the scaffolds with T4 DNA polymerase (16 U, 16 °C, 1 h), the vectors were purified by phenol extraction and G-25 Sephadex filtration. The preparation of plasmid containing the ketone analogue (K) was slightly different. The oligonucleotide containing the ketone precursor<sup>3</sup> was phosphorylated, phenol extracted and precipitated in 70% ethanol. The pellet was resuspended in NaOAc buffer (pH 6.0, 100 mM) and treated with NaIO<sub>4</sub> (10 mM, 1 h) before being precipitated in 70% ethanol. The ligation and T4 DNA polymerase digestion were carried out in 1 × buffer 1 (20 mM bis-trispropane, 10 mM MgCl<sub>2</sub>, pH 7.0) in place of the corresponding commercially-supplied reaction buffer. This is important to prevent adventitious cleavage of the oligonucleotide.

Wild-type (AB1157), polymerase II (STL1336), polymerase IV (Xs-1), polymerase V (SR1157U) and triple knockout cells (SF2108) were grown to an OD<sub>600</sub> of 0.3, pelleted, and resuspended in 10 mM MgSO<sub>4</sub>. The cells were irradiated at 45 J/m<sup>2</sup>, added to 25 mL 2 × YT, and incubated at 37 °C for 45 min. The cells were pelleted, washed with cold water, and resuspended in 10% glycerol. The prepared cells (100 µL) were electroporated with 1 pmol of the vector (2.5 kV, 4.74 ms), and plated with X-Gal and IPTG.

**REAP Assay to Determine Mutation Frequency.** Mutation analysis was carried out using the restriction endonuclease and postlabeling (REAP) assay, which has previously been described.<sup>2</sup> Briefly, viral DNA was recovered from the growth medium and PCR amplified.

Following digestion with *Bbs*I and shrimp alkaline phosphatase, the DNA was  $^{32}\text{P}$ -labeled and further digested with *Hae*III. The desired 18mer product was purified using 20% denaturing PAGE and desalted using a G25- Sephadex column. Finally, the samples were digested with nuclease P1 and nucleotides separated on a PEI cellulose TLC plate which was run with saturated  $(\text{NH}_4)_2\text{HPO}_4$  and  $\text{H}_3\text{PO}_4$ , pH 5.8.

**Molecular Modeling.** The structure of MeG:L was optimized at the PM3 level in the gas phase. The distances between the N-methyl carbon of MeG, O3 and O5 of L were constrained using the corresponding distances between C1' of ddADP, O3' and O5' of T in the template strand in the Dpo4-DNA crystal structure (PDB: IJX4). The dihedral angle between N9, and the N-methyl carbon of MeG, O3 and O5 of L were also constrained using the dihedral angle in the crystal structure to prevent MeG from rotating into a conformation that was equivalent to the  $\alpha$ -anomer of ddGDP. Failure to constrain the dihedral angle resulted in an optimized structure corresponding to the  $\alpha$ -anomer of ddGDP. The optimized structure of MeG:L was then superimposed onto the Dpo4 crystal structure to replace ddADP:T.

- (1) In vivo Bypass Efficiencies and Mutational Signatures of the Guanine Oxidation Products 2-Aminoimidazolone and 5-Guanidino-4-nitroimidazole. Neeley, W. L.; Delaney, J. C.; Henderson, P. T.; Essigmann, J. M. *J. Biol.Chem.* **2004**, 279, 43568-43573.
- (2) Mutagenic Effects of 2-Deoxyribonolactone in Escherichia coli. An Abasic Lesion That Disobeys the A-Rule. Kroeger, K. M.; Jiang, Y. L.; Kow, Y. W.; Goodman, M. F.; Greenberg, M. M. *Biochemistry* **2004**, 43, 6723-6733.
- (3) Synthesis and Analysis of Oligonucleotides Containing Abasic Site Analogues. Huang, H.; Greenberg, M. M. *J. Org. Chem.* **In press**.

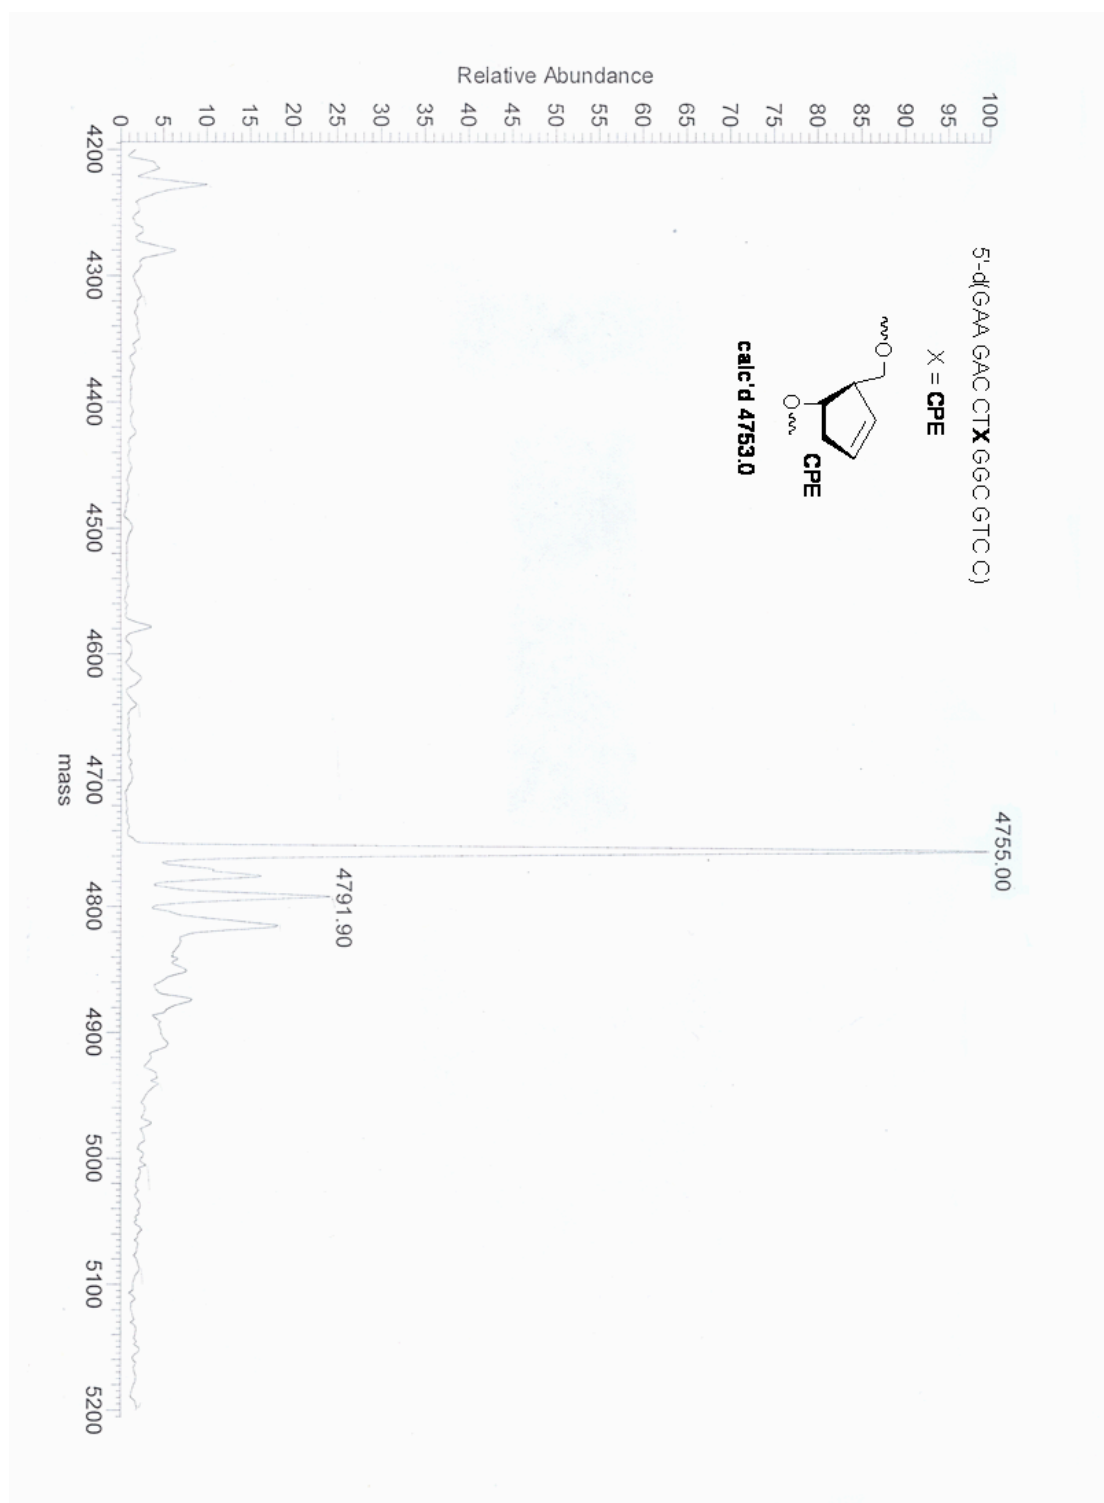

**Supporting Information Figure 1.** ESI-MS of **CPE** (3' to T).

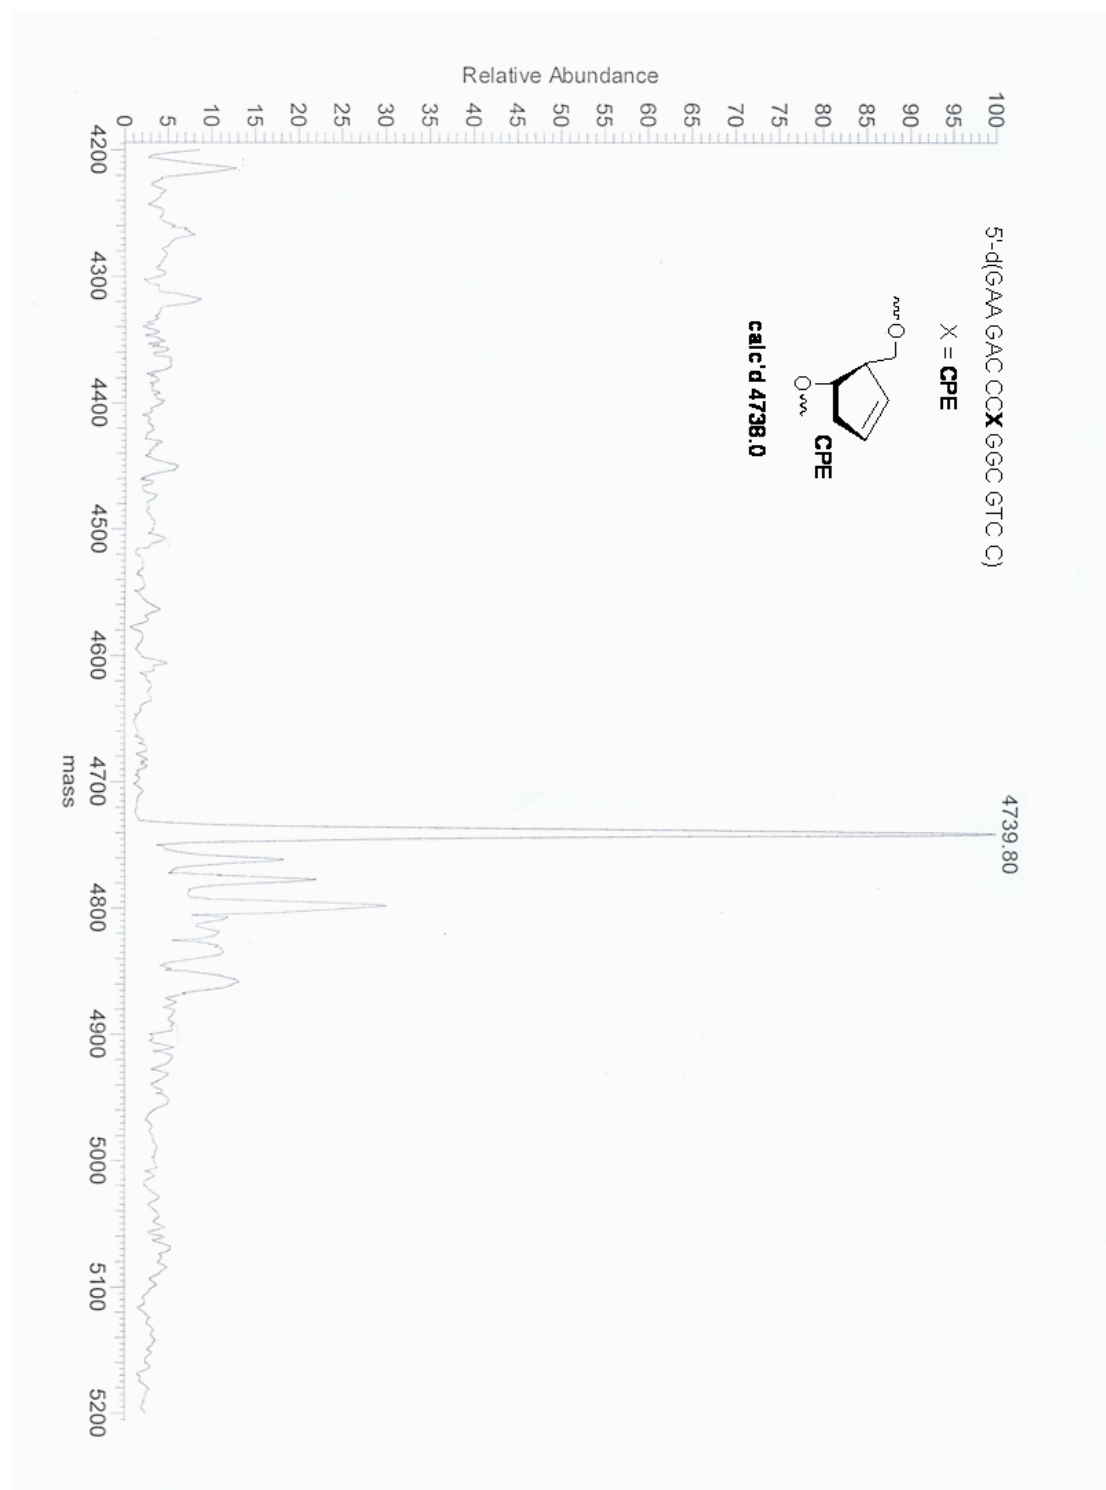

**Supporting Information Figure 2.** ESI-MS of CPE (3' to C).

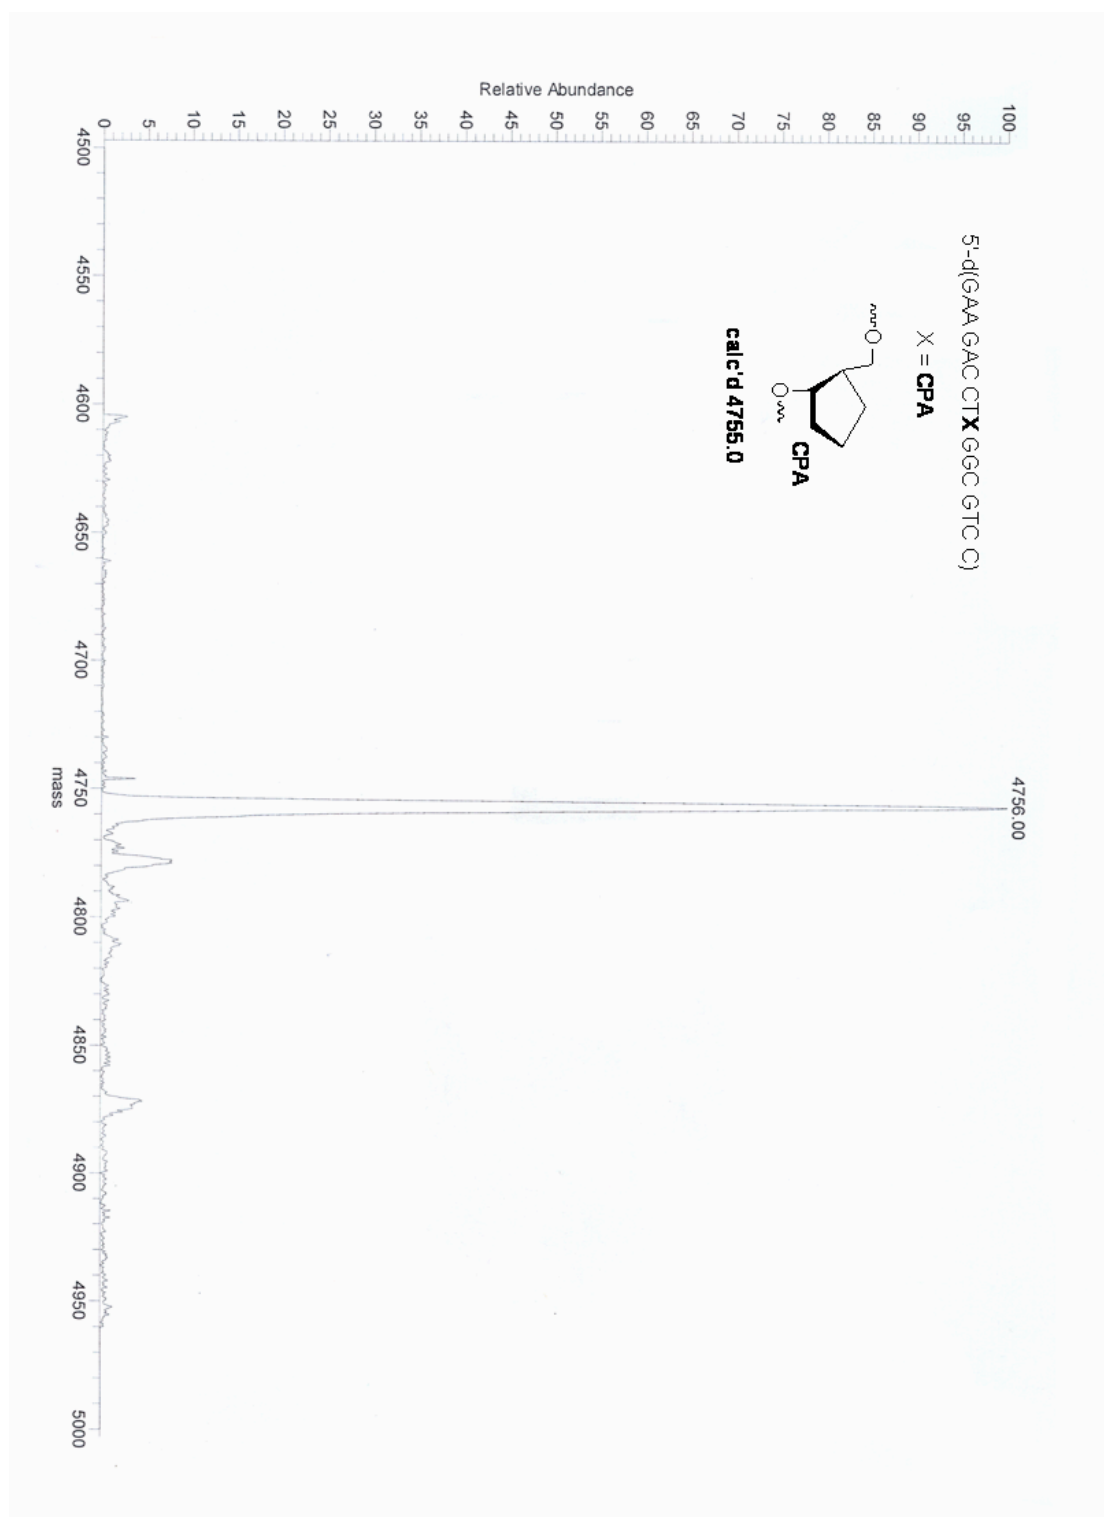

Supporting Information Figure 3. ESI-MS of CPA (3' to T).

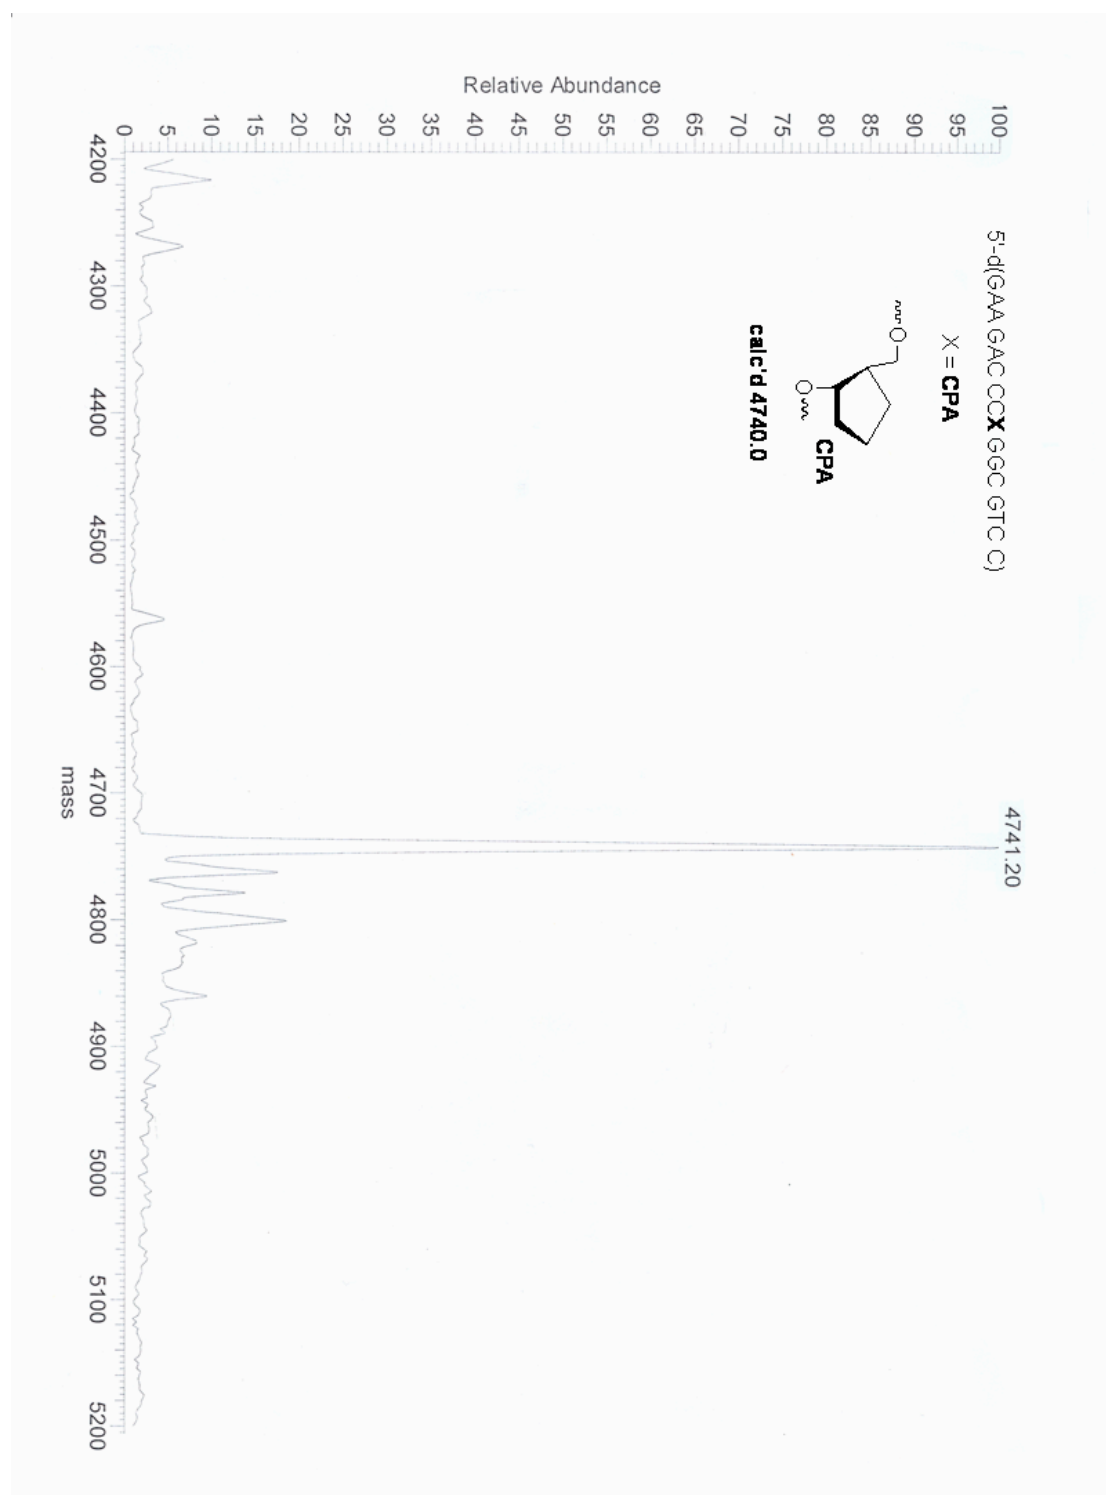

**Supporting Information Figure 4.** ESI-MS of CPA (3' to C).

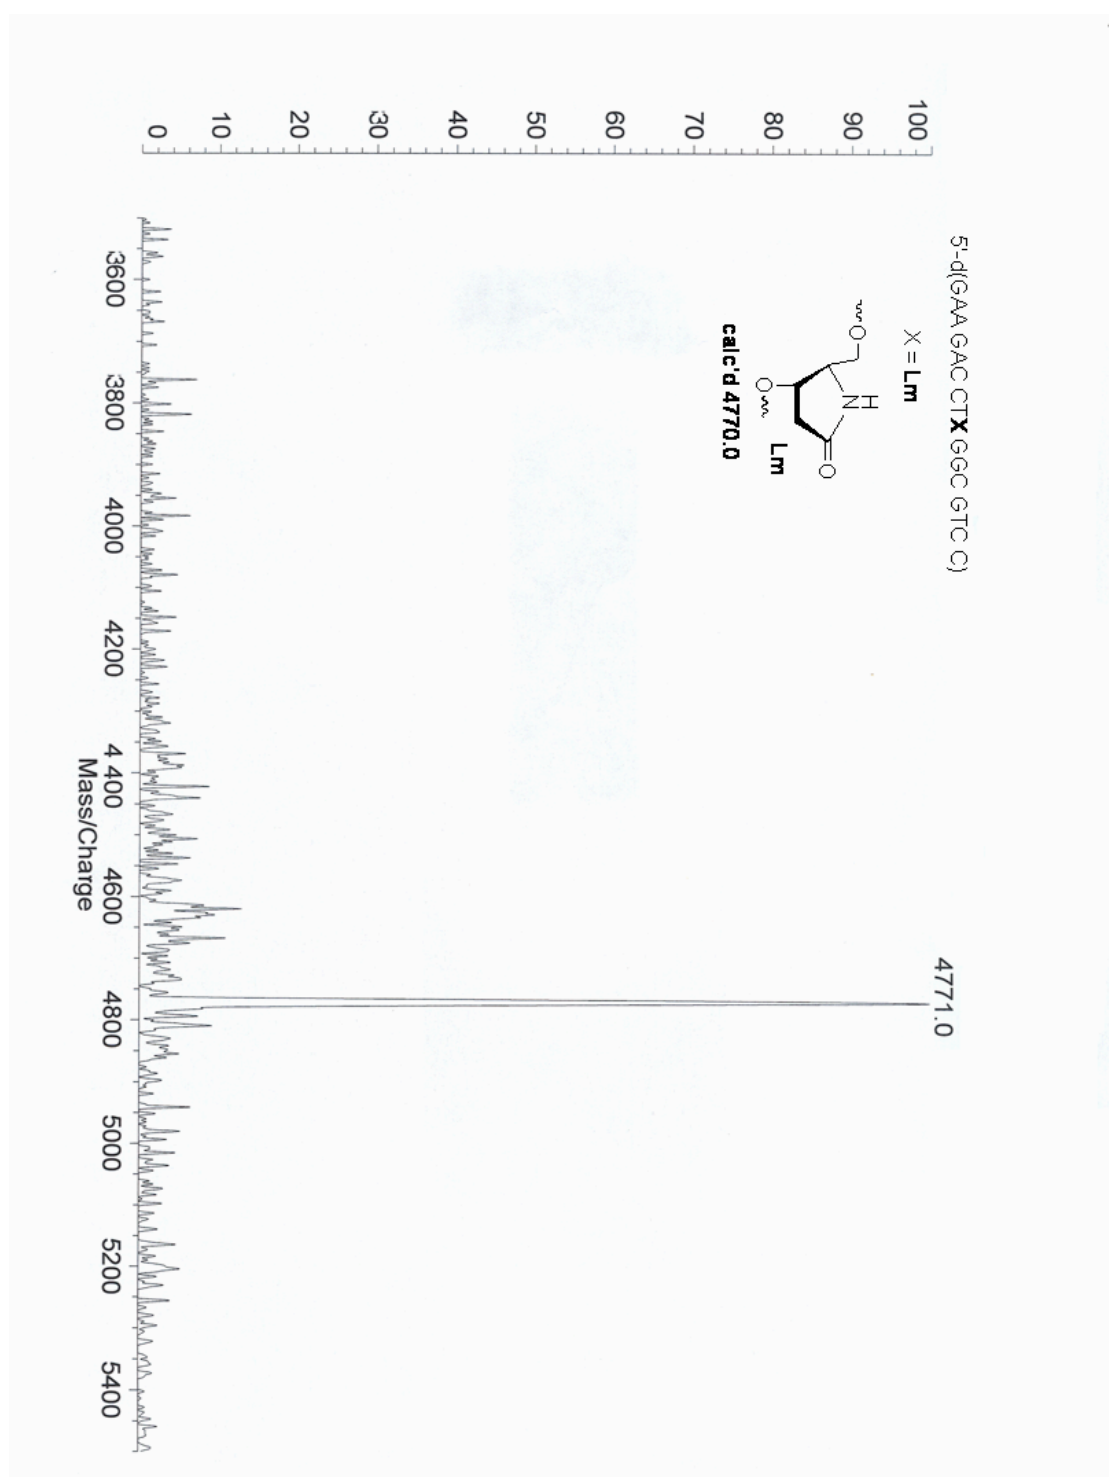

**Supporting Information Figure 5.** MALDI-TOF-MS of **Lm** (3' to T).



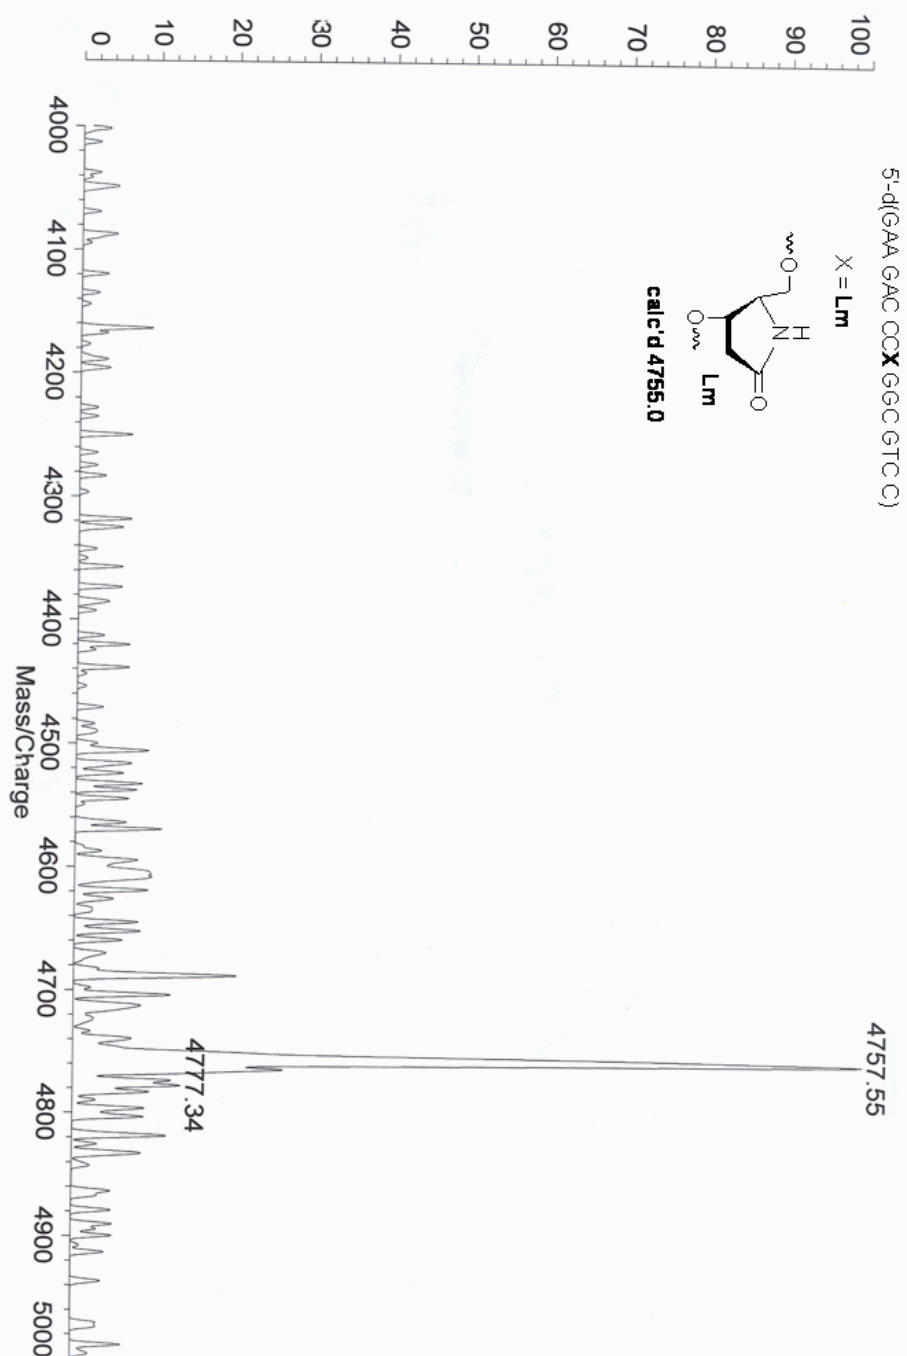

Supporting Information Figure 6. MALDI-TOF-MS of Lm (3' to C).

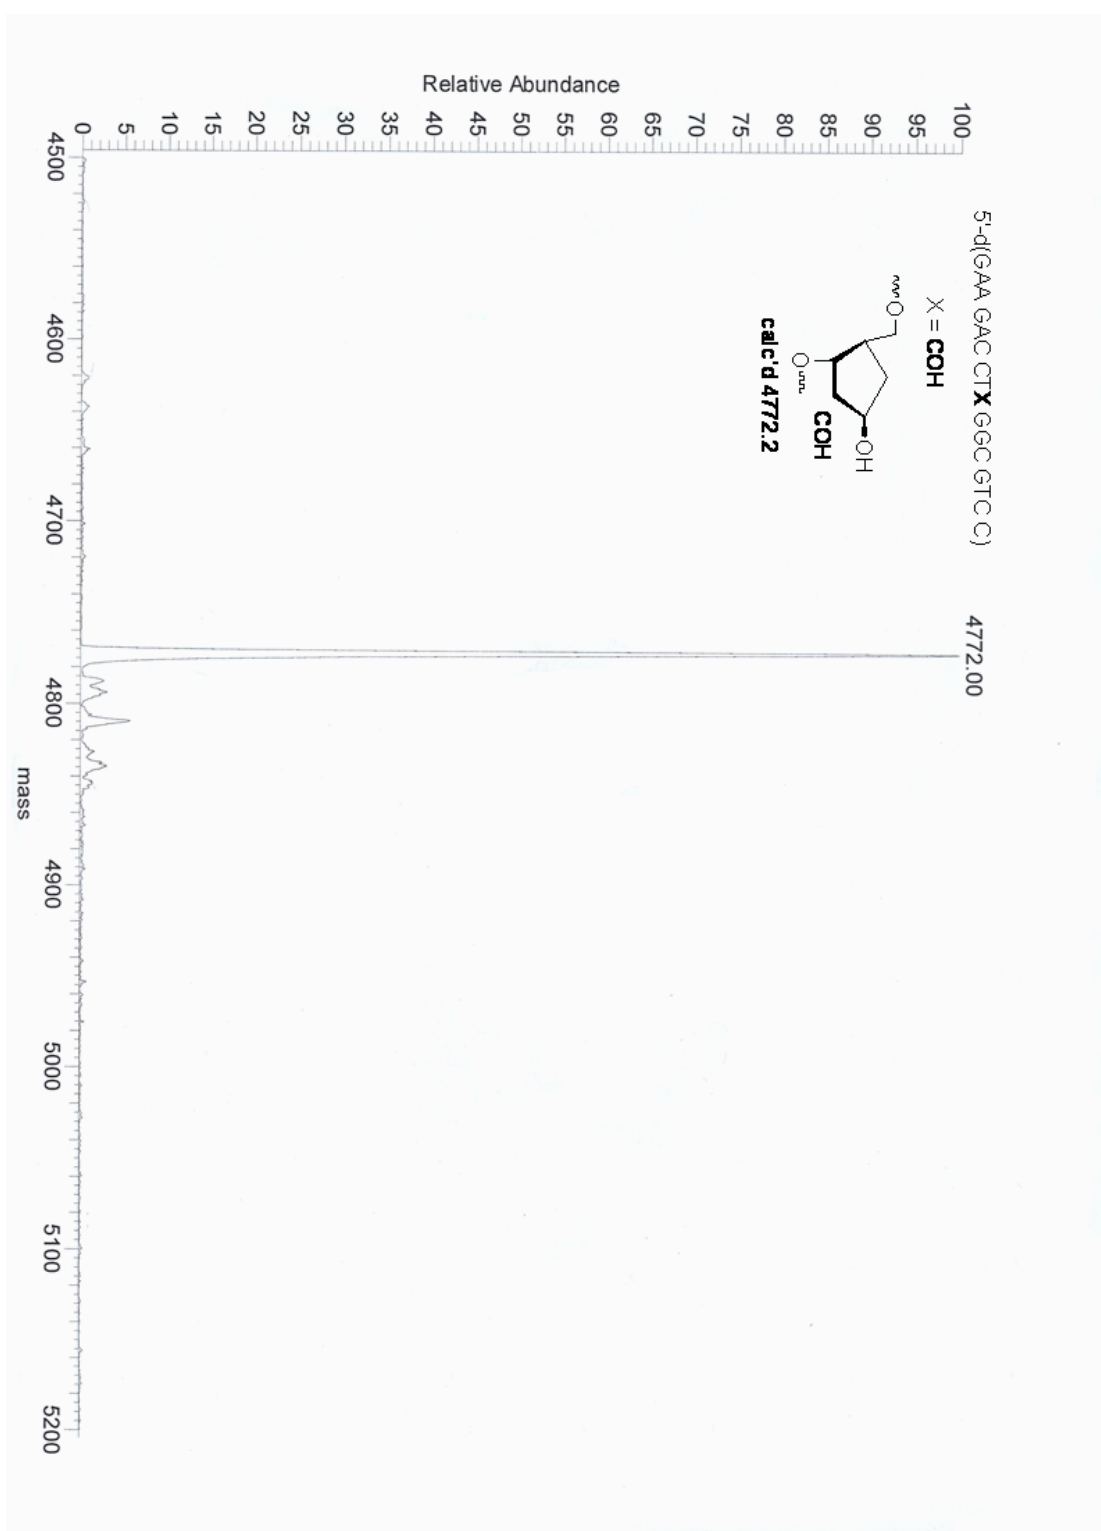

Supporting Information Figure 7. ESI-MS of COH (3' to T).

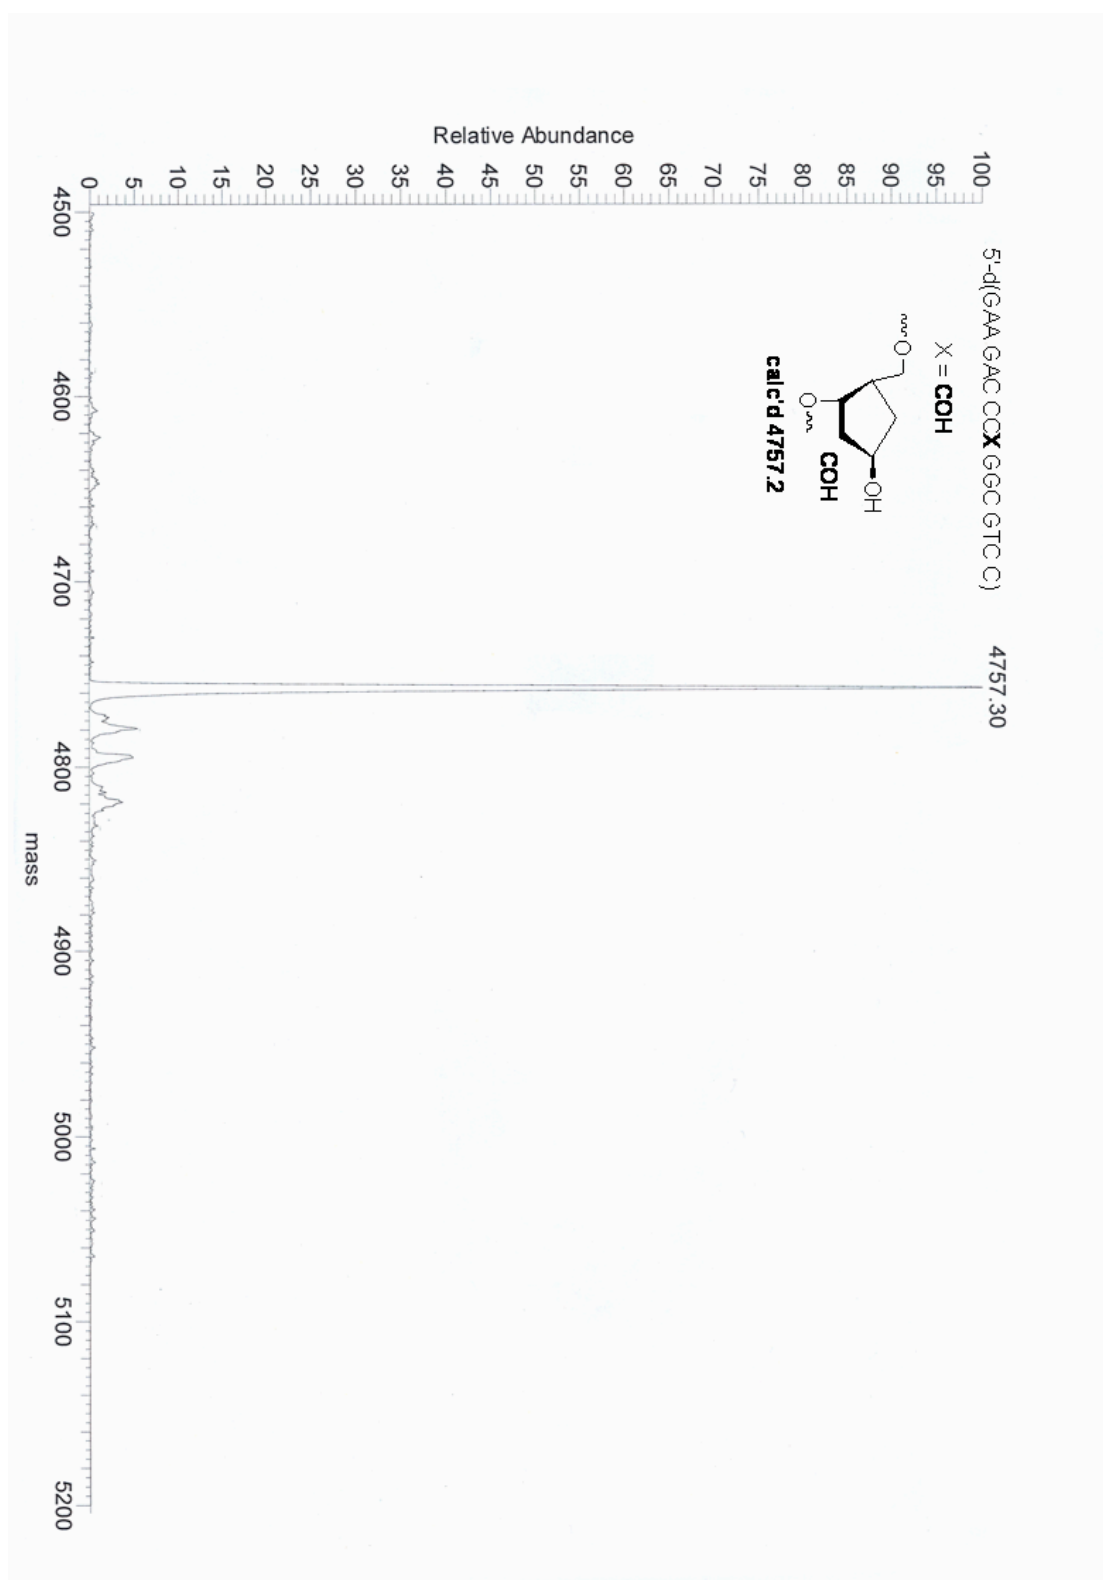

**Supporting Information Figure 8.** ESI-MS of COH (3' to C).

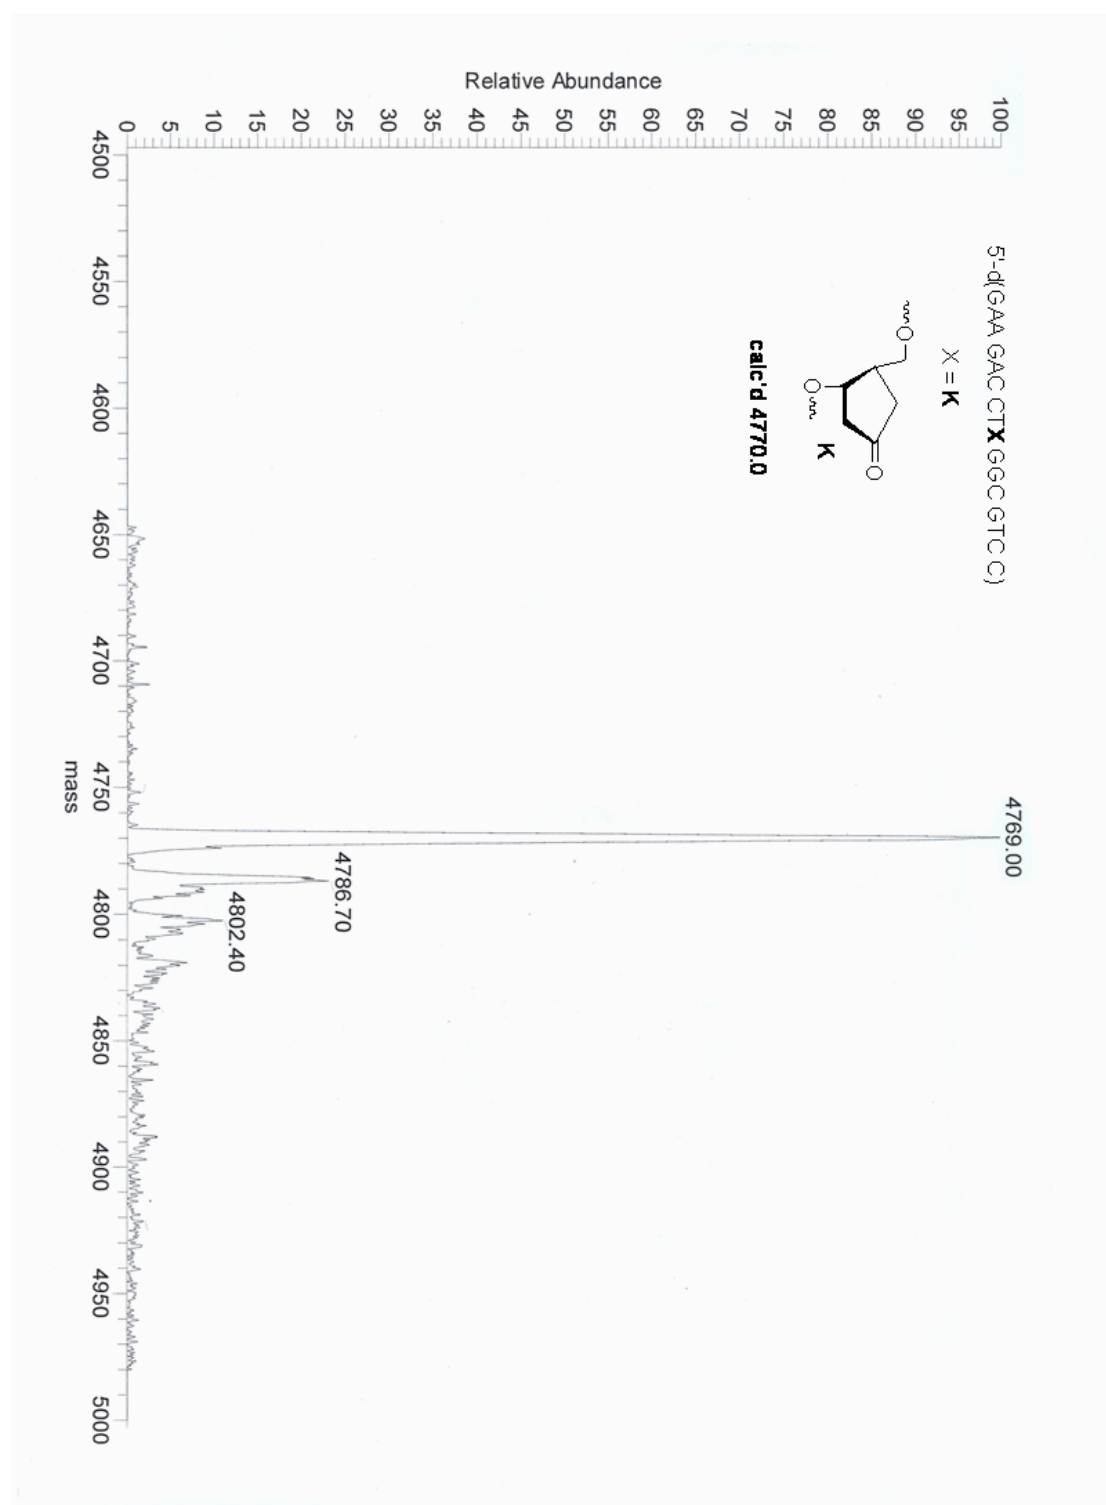

Supporting Information Figure 9. ESI-MS of **K** (3' to T).

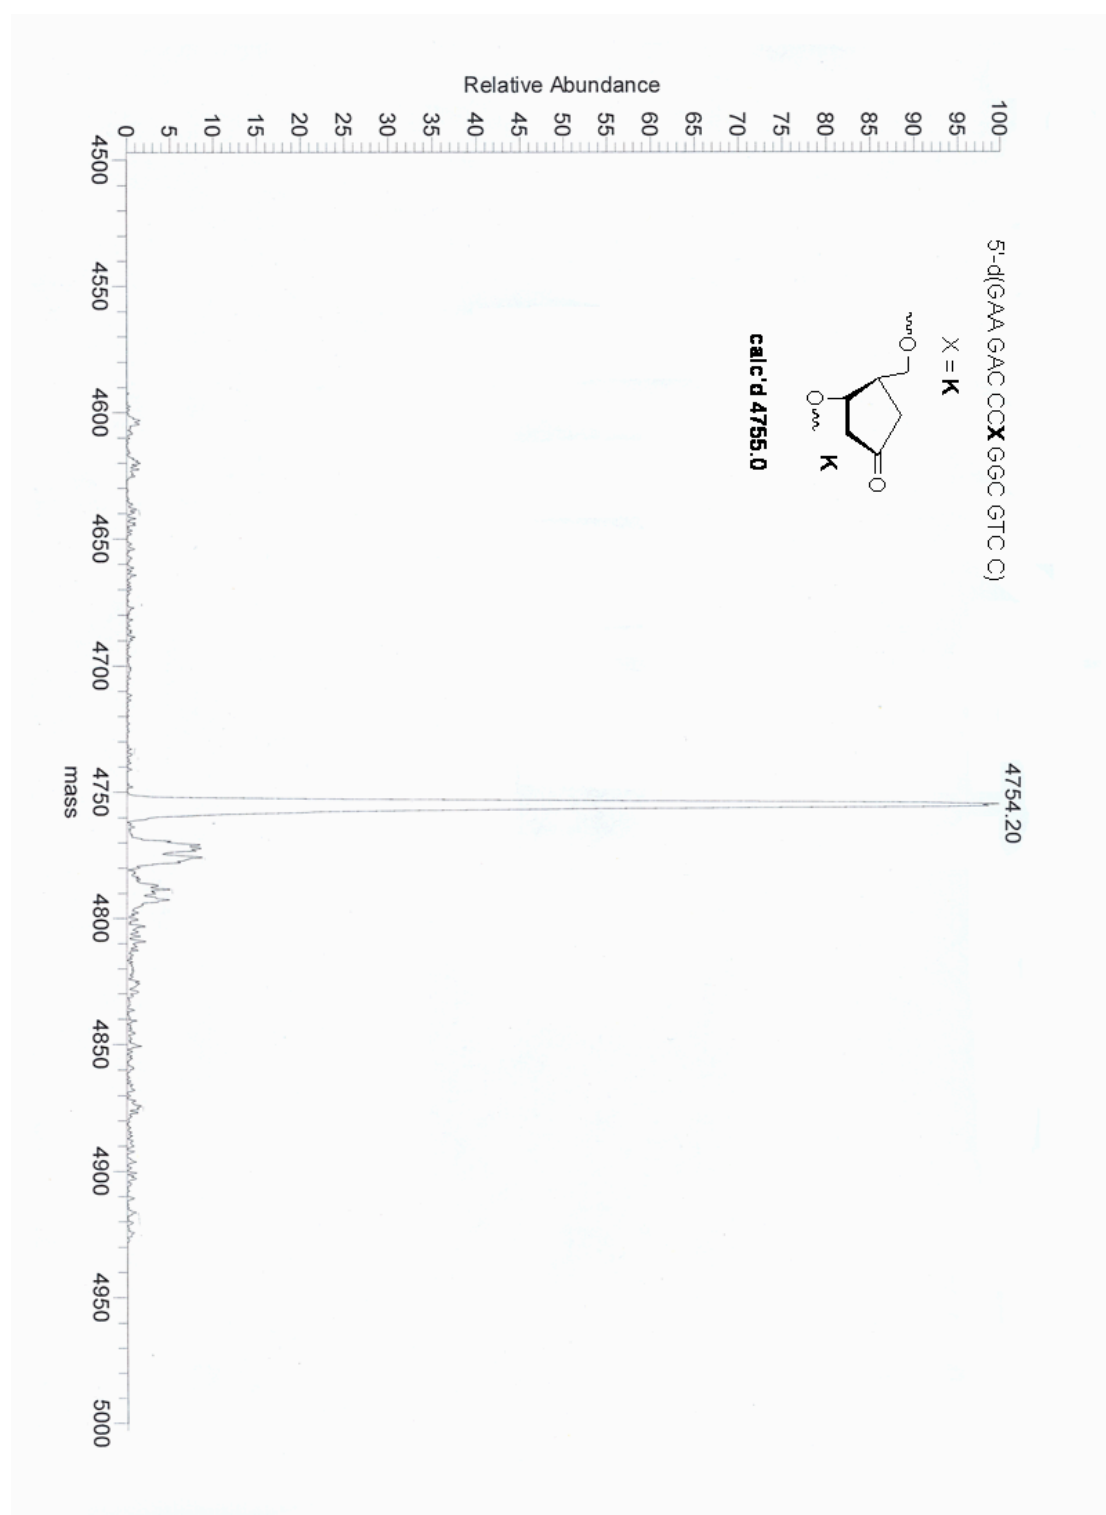

Supporting Information Figure 10. ESI-MS of **K** (3' to C).

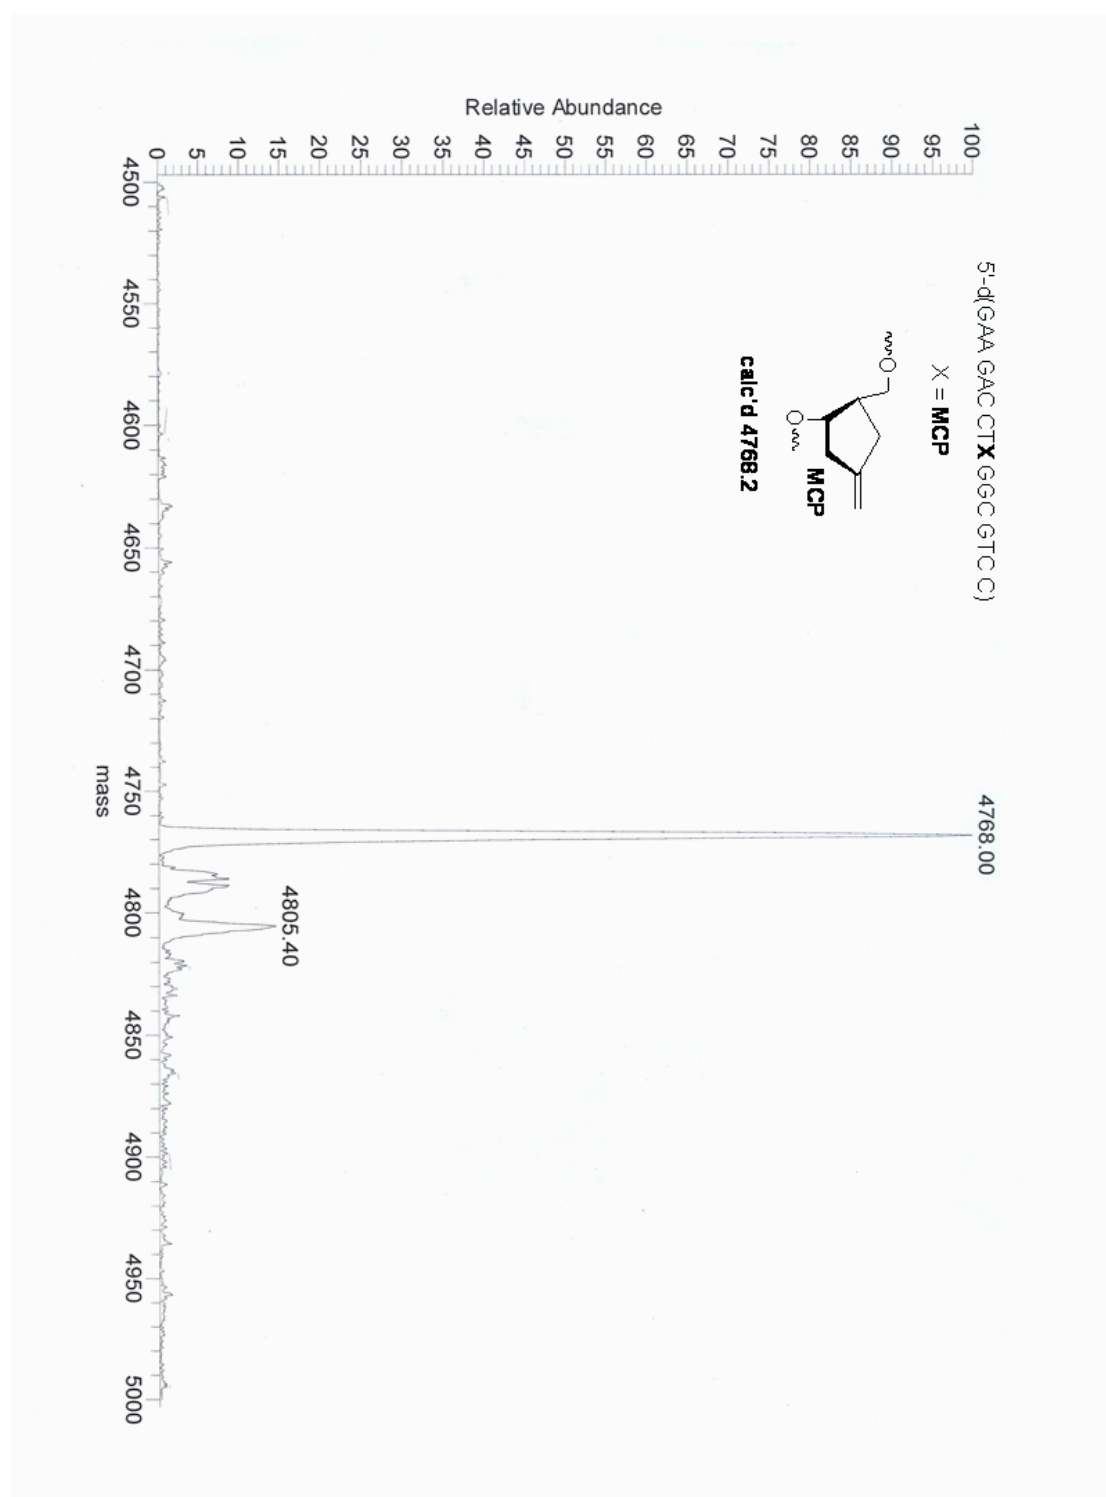

Supporting Information Figure 11. ESI-MS of MCP (3' to T).

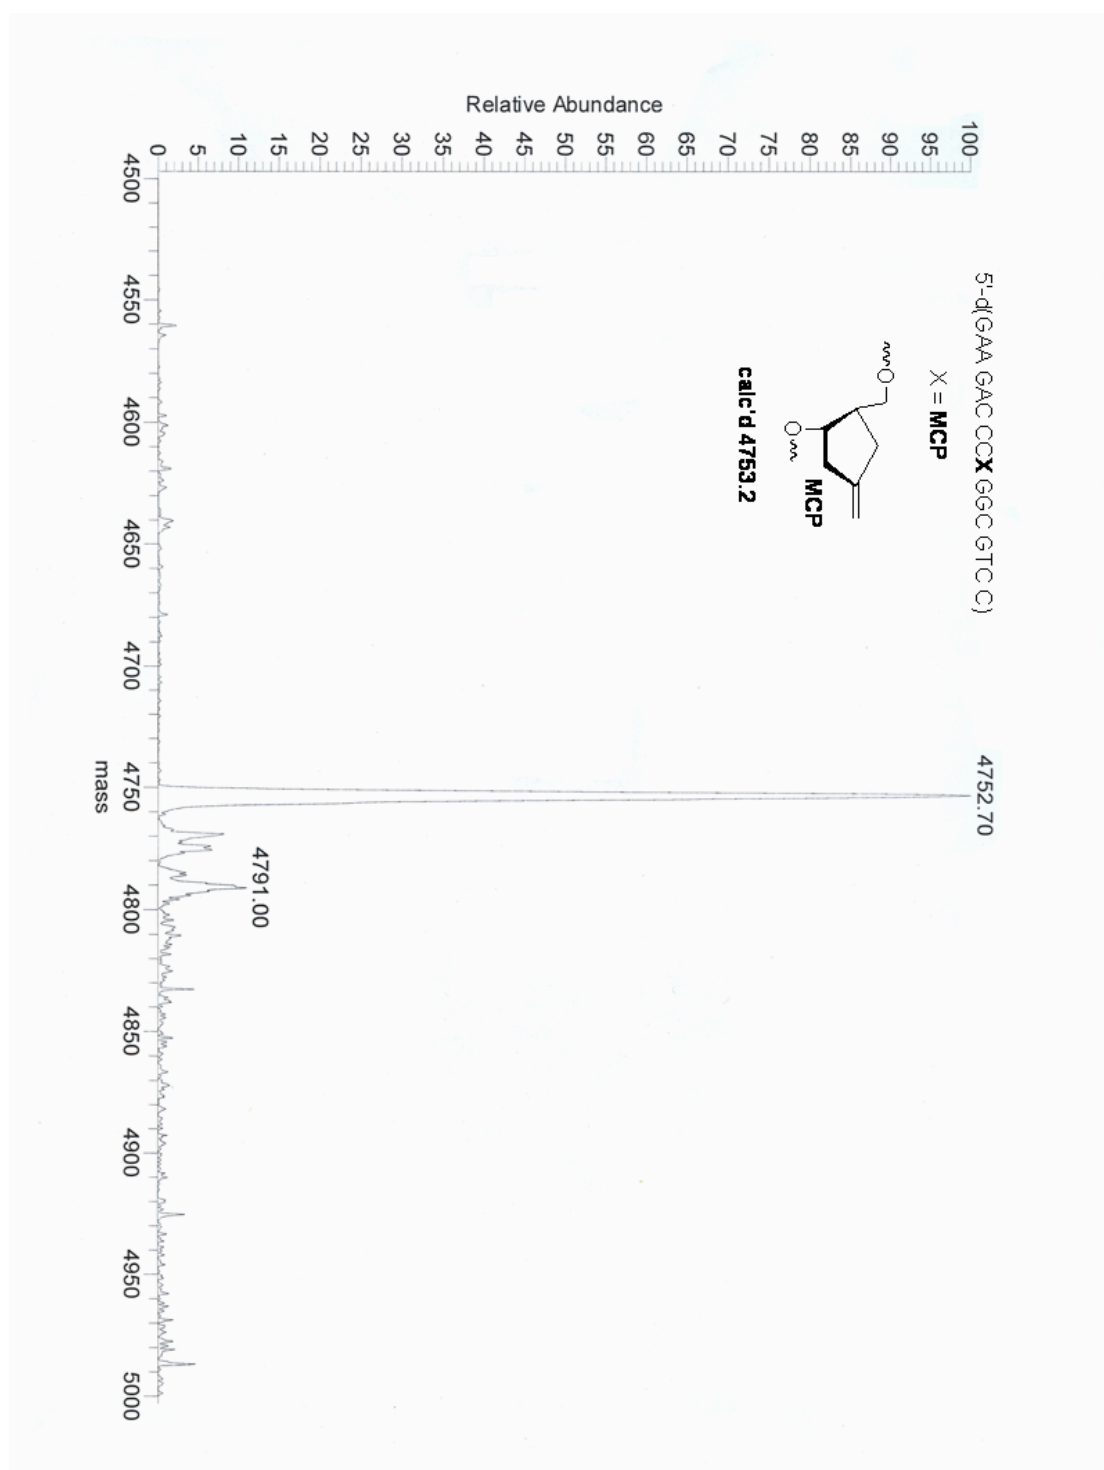

Supporting Information Figure 12. ESI-MS of MCP (3' to C).

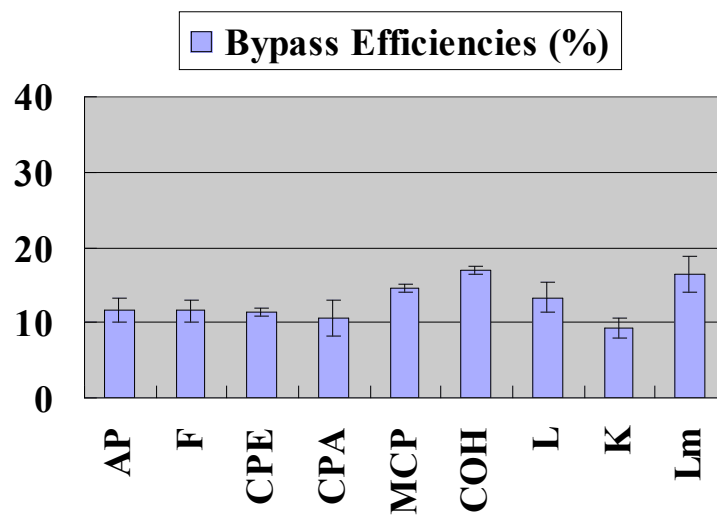

**Supporting Information Figure 13.** Bypass efficiency in wild type *E. coli*. local sequence: 5'-TXG-3'.

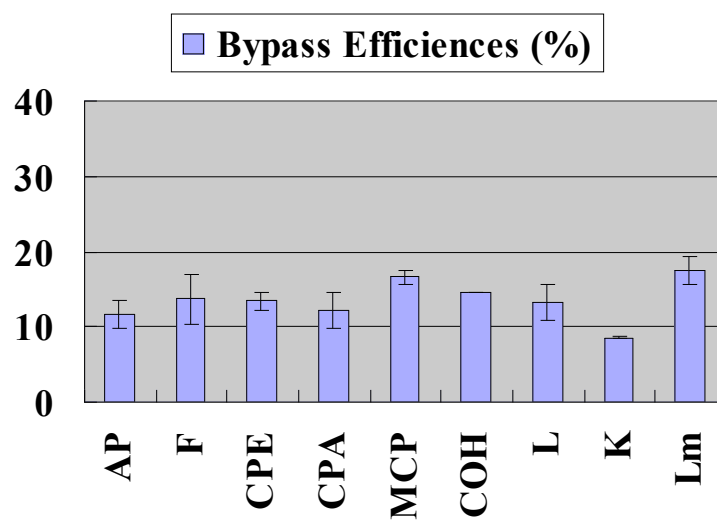

**Supporting Information Figure 14.** Bypass efficiency in wild type *E. coli*. local sequence: 5'-CXG-3'.



**Supporting Information Table 1.** Bypass efficiency in various polymerase-deficient *E. coli*.

| Lesion and Sequence | Pol II <sup>-</sup> | Pol IV <sup>-</sup> | Pol V <sup>-</sup> | Triple-knockout |
|---------------------|---------------------|---------------------|--------------------|-----------------|
| TFG (%)             | 8.1 ± 0.1           | 6.4 ± 1.8           | 8.8 ± 0.2          | 0               |
| CFG (%)             | 6.9 ± 0             | 4.9 ± 0.8           | 9.9 ± 1.4          | 0               |
| TLG (%)             | 9.4 ± 0.1           | 7.9 ± 0.7           | 7.7 ± 0.3          | 0               |
| CLG (%)             | 7.8 ± 1.0           | 6.1 ± 0.6           | 9.3 ± 1.0          | 0               |
| TKG (%)             | 7.6 ± 2.8           | 4.1 ± 0.8           | 0.9 ± 0.1          | 0               |
| CKG (%)             | 5.6 ± 1.2           | 3.3 ± 0.5           | 0.8 ± 0.2          | 0               |
| TLmG (%)            | 13.9 ± 1.9          | 10.4 ± 1.4          | 9.9 ± 1.4          | 0               |
| CLmG (%)            | 16.2 ± 3.1          | 9.2 ± 0             | 12.2 ± 0.6         | 0               |

**Supporting Information Table 2.** Percent single-nucleotide-deletion product in wild type *E.*

*coli*.

| X       | TXG         | CXG         |
|---------|-------------|-------------|
| AP (%)  | 1.0 ± 1.0   | 9.3 ± 0.8   |
| F (%)   | 22.6 ± 6.0  | 72.3 ± 9.6  |
| CPE (%) | 47.2 ± 12.3 | 50.8 ± 11.9 |
| CPA (%) | 72.2 ± 11.0 | 68.9 ± 11.1 |
| COH (%) | 3.3 ± 1.3   | 11.4 ± 6.4  |
| MCP (%) | 7.9 ± 3.1   | 12.9 ± 2.5  |
| L (%)   | 11.2 ± 8.4  | 23.4 ± 11.9 |
| K (%)   | 1.6 ± 1.5   | 6.1 ± 4.7   |
| Lm (%)  | 7.0 ± 1.8   | 37.3 ± 9.3  |

**Supporting Information Table 3.** Percent single-nucleotide-deletion product in various polymerase-deficient *E. coli*.

| Lesion and Sequence | Pol II <sup>-</sup> | Pol IV <sup>-</sup> | Pol V <sup>-</sup> |
|---------------------|---------------------|---------------------|--------------------|
| TFG (%)             | 19.9 ± 3.6          | 11.4 ± 2.0          | 100                |
| CFG (%)             | 54.6 ± 4.8          | 80.0 ± 3.5          | 100                |
| TLG (%)             | 14.7 ± 4.3          | 10.5 ± 0.3          | 100                |
| CLG (%)             | 15.7 ± 2.7          | 15.6 ± 0.6          | 100                |
| TKG (%)             | 0                   | 0                   | - *                |
| CKG (%)             | 3.2 ± 0.4           | 1.3 ± 1.3           | - *                |
| TLmG (%)            | 5.6 ± 2.0           | 4.2 ± 0.1           | 100                |
| CLmG (%)            | 36.6 ± 10.6         | 32.7 ± 1.3          | 100                |

\* Bypass efficiency < 1%

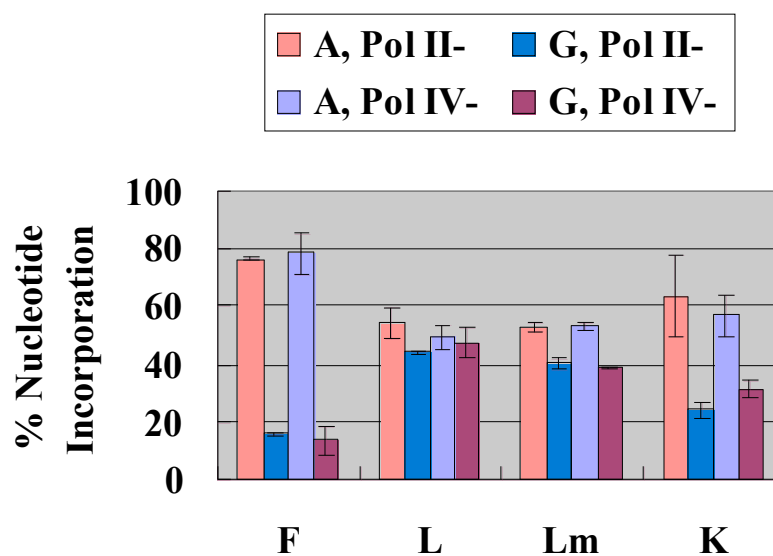

**Supporting Information Figure 15.** Percent nucleotide incorporation opposite the lesions in Pol II and Pol IV deficient *E. coli*. local sequence: 5'-TXG-3'.

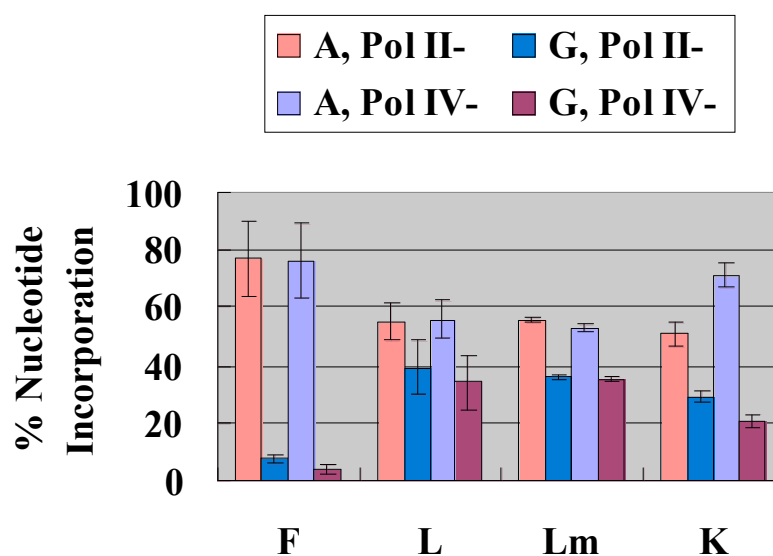

**Supporting Information Figure 16.** Percent nucleotide incorporation opposite the lesions in Pol II and Pol IV deficient *E. coli*. local sequence: 5'-CXG-3'.
